# Supplementary material for: Gut microbiome and brain transcriptome analyses reveal the effect of walnut oil in preventing scopolamine-induced cognitive impairment
Source: Royal Society of Chemistry journal article supplement (doi:10.1039/d3fo01893h), 2023-01-01
Supplement: d3fo01893h1.pdf [file d3fo01893h1.pdf]

1  
2  
3  
4  
5  
6  
7  
8  
9  
10  
11  
12  
13  
14  
15  
16  
17  
18  
19  
20  
21  
22  
23  
24  
25  
26  
27  
28  
29  
30  
31  
32  
33  
34  
35  
36  
37  
38  
39  
40

## Supporting Information

### **Gut microbiome and brain transcriptome analyses reveal the effect of walnut oil in preventing scopolamine-induced cognitive impairment**

Jing Yi Zheng,<sup>a</sup> Ting Kang,<sup>a</sup> Chao Jiang,<sup>a</sup> Li Ke Lin,<sup>a</sup> Lu Gao,<sup>a</sup> Li Hua Jin,<sup>a\*</sup> Yu Shu,<sup>b</sup> Jing Jing Zhang,<sup>c</sup> Cong Li,<sup>a\*</sup> Bang Chen<sup>a</sup> and Ye Hua Shen<sup>a\*</sup>

<sup>a</sup>: Key Laboratory of Synthetic and Natural Functional Molecule Chemistry of Ministry of Education, College of Chemistry and Materials Science, National Demonstration Center for Experimental Chemistry Education, Northwest University, Xi'an, Shaanxi 710127, China

<sup>b</sup>: College of Food Science and Technology, Northwest University, Xi'an Shaanxi 710069, China

<sup>c</sup>: School of Chemical Engineering, Northwest University, Xi'an, Shaanxi 710069, China

41 \* Corresponding author: Li Hua Jin, Cong Li, Ye Hua Shen

42 E-mail: jinlihua@nwu.edu.cn; licong@nwu.edu.cn; yhshen@nwu.edu.cn

43 **Table S1.** Lipid composition (%) and minor compositions content (mg/kg) of walnut oils.

| Fatty acid (%) | Walnut oil (%) | Triacylglycerol (%) | Walnut oil (%) | Minor components (mg/kg) | Walnut oil (%) |
|----------------|----------------|---------------------|----------------|--------------------------|----------------|
| C18:2          | 52.09          | L-L-L               | 36.98          | $\alpha$ -Tocopherol     | 8.51           |
| C18:1          | 21.95          | O-L-L               | 13.03          | $\beta$ -Tocopherol      | 0.45           |
| C16:0          | 8.23           | L-L-Ln              | 10.85          | $\gamma$ -Tocopherol     | 207.8          |
| C18:3          | 7.06           | P-L-L               | 7.71           | $\delta$ -Tocopherol     | 9.71           |
| C12:0          | 3.36           | O-O-L               | 6.66           | Campesterol              | 54.77          |
| C20:3          | 2.88           | O-L-Ln              | 4.32           | $\beta$ -Sitosterol      | 975.61         |
| C17:1          | 0.76           | P-O-L               | 3.35           | Stigmasterol             | 1.05           |
| C20:2          | 0.60           | S-L-O               | 2.77           | $\Delta$ 5-Avenasterol   | 42.37          |
| C17:0          | 0.55           | L-Ln-Ln             | 2.28           | Squalene                 | 4.81           |
| C20:4          | 0.55           | L-S-L               | 1.82           | Polyphenols              | 7.95           |
| C11:0          | 0.52           | P-O-O               | 1.78           |                          |                |
| C14:1          | 0.41           | P-Ln-L              | 1.67           |                          |                |
| C18:0          | 0.37           | O-O-Ln              | 1.62           |                          |                |
| C20:1          | 0.23           | P-P-S               | 1.26           |                          |                |
| C14:0          | 0.21           | P-O-Ln              | 1.03           |                          |                |
| C15:1          | 0.11           | S-L-Ln              | 0.95           |                          |                |
| C15:0          | 0.07           | P-P-P               | 0.95           |                          |                |
| C13:0          | 0.05           | Ln-Ln-Ln            | 0.91           |                          |                |
| SFA            | 13.36          |                     |                |                          |                |
| MUFA           | 23.46          |                     |                |                          |                |
| PUFA           | 63.18          |                     |                |                          |                |

44 SFA (C16:0 + C12:0 + C17:0 + C11:0 + C18:0 + C14:0 + C15:0 + C13:0), MUFA (C18:1 + C17:1  
 45 + C14:1 + C20:1 + C15:1), PUFA (C18:2 + C18:3 + C20:3 + C20:2 + C20:4). P, palmitic; S, stearic;  
 46 O, oleic; L, linoleic; Ln, linolenic.

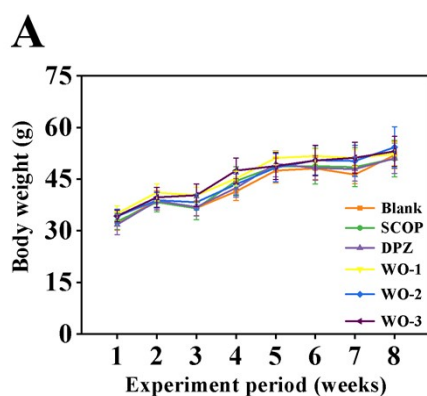

| Group | Organ Coefficient |           |           |           |           |           |
|-------|-------------------|-----------|-----------|-----------|-----------|-----------|
|       | Heart             | Liver     | Spleen    | Kidney    | Lung      | Brain     |
| Blank | 0.51±0.11         | 4.04±0.41 | 0.17±0.05 | 1.30±0.16 | 0.60±0.14 | 0.87±0.09 |
| SCOP  | 0.52±0.12         | 4.29±1.16 | 0.25±0.08 | 1.26±0.15 | 0.68±0.19 | 0.89±0.08 |
| DPZ   | 0.56±0.09         | 4.80±0.63 | 0.26±0.12 | 1.26±0.21 | 0.57±0.13 | 0.86±0.09 |
| WO-1  | 0.57±0.09         | 4.17±0.32 | 0.22±0.06 | 1.35±0.09 | 0.62±0.13 | 0.81±0.09 |
| WO-2  | 0.56±0.11         | 4.00±0.59 | 0.25±0.16 | 1.27±0.20 | 0.57±0.22 | 0.88±0.13 |
| WO-3  | 0.50±0.09         | 4.08±0.41 | 0.35±0.41 | 1.15±0.17 | 0.55±0.11 | 0.80±0.09 |

47  
 48 **Figure S1.** Effect of WO on body weight and organ coefficient of the SCOP-induced mice. (A)  
 49 Experimental schedule of WO supplementation. (A) Body weight. (B) Organ coefficient. Data are  
 50 presented as the mean  $\pm$  standard error of the mean (SEM), n = 10. \* $p$  < 0.05, \*\* $p$  < 0.01 compared  
 51 to the Blank group; # $p$  < 0.05, ## $p$  < 0.01 compared to the SCOP group.

**A**

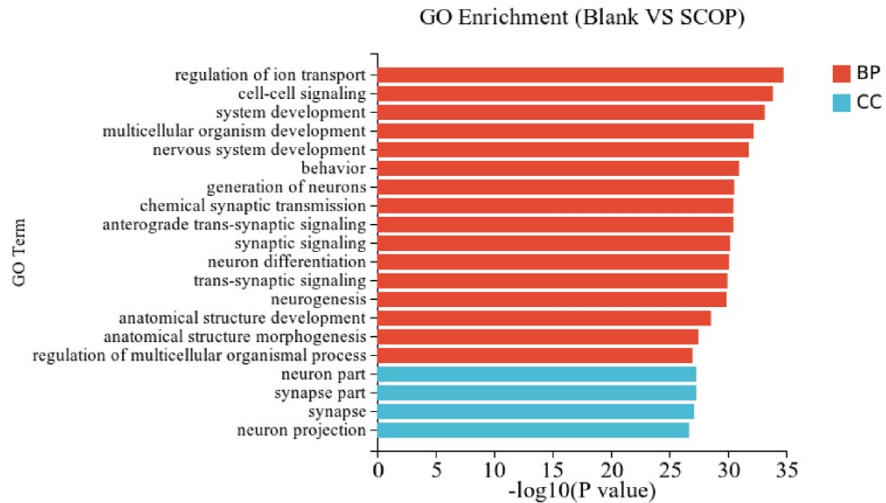

**B**

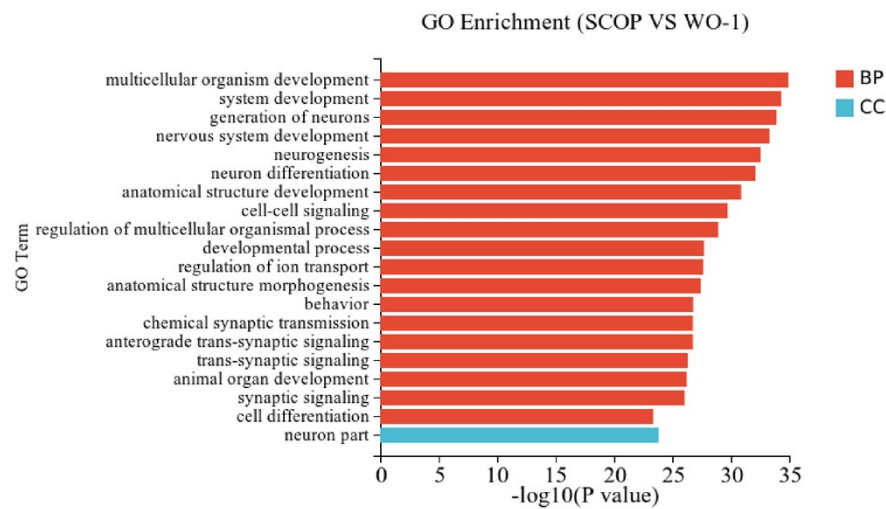

**C**

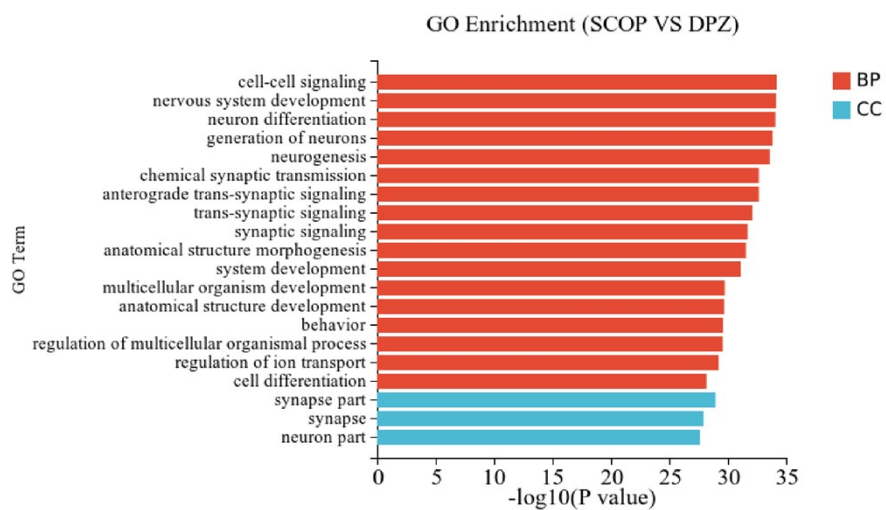

52

53 **Figure S2.** The GO enrichment analysis of DEGs (the top 20 GO terms with the lowest p-value  
 54 and the most significant enrichment) between the Blank vs SCOP group (A), SCOP vs WO-1  
 55 group (B) and SCOP vs DPZ group (C).

56

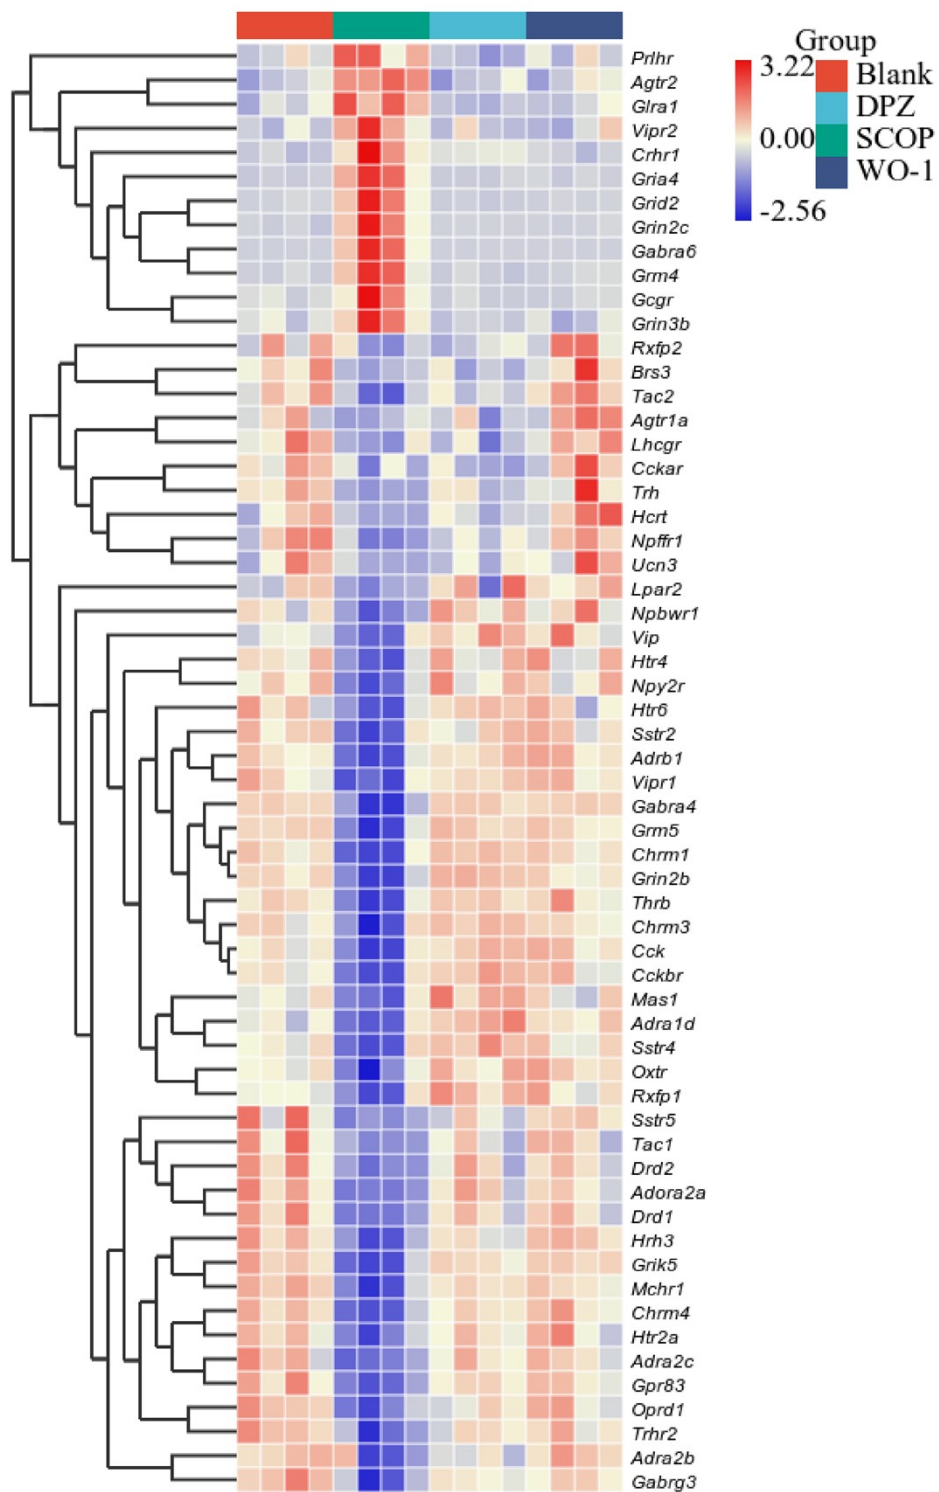

57  
 58 **Figure S3.** A Z score-scaled heatmap of 60 DEGs which between SCOP and WO-1  
 59 and related to neuroactive ligand-receptor interaction pathways in each group.

60  
 61  
 62  
 63

64

65

**Table S2.** Statistical analysis of beta diversity

| Group1 | Group2 | R     | p-value |
|--------|--------|-------|---------|
| all    | -      | 0.588 | 0.001   |
| Blank  | SCOP   | 0.681 | 0.028   |
| Blank  | DPZ    | 0.484 | 0.008   |
| Blank  | WO-1   | 0.576 | 0.008   |
| SCOP   | DPZ    | 0.738 | 0.022   |
| SCOP   | WO-1   | 0.788 | 0.005   |
| DPZ    | WO-1   | 0.308 | 0.015   |

66
